# Supplementary material for: Frequencies of CYP2C9 polymorphisms in North Indian population and their association with drug levels in children on phenytoin monotherapy
Source: PubMed Central journal article supplement (PMC4868001; doi:10.1186/s12887-016-0603-0), 2016-05-14
Supplement: 12887_2016_603_MOESM1_ESM.pdf [file 12887_2016_603_MOESM1_ESM.pdf]

### **Additional file 1**

PCR was performed by initial denaturation at 94 °C for 2 minutes followed by 35 cycles of denaturation at 94 °C for 30 seconds, annealing at 60 °C for 10 seconds and extension at 72°C for 1 minute followed by final extension at 72 °C for 7 minutes. The products were run at 250 volts in a horizontal electrophoresis system (Bangalore Genie) on a 2% agarose gel to check for amplification. 5 µL of PCR products (375 bp) were digested overnight at 37 °C with *Ava II* (New England Biolabs) for CYP2C9\*2 genotyping. A 130 bp amplicon was digested by *Sty I* (*Eco 130I*) (Fermentas International Inc) for CYP2C9\*3 genotyping. After the overnight digestion, the digested DNA was run along with the undigested PCR product on a 2% agarose gel with ethidium bromide at 150 volts in a horizontal electrophoresis system and visualized under UV light.
